# Supplementary material
Source: Royal Society of Chemistry journal article supplement (https://www.rsc.org/suppdata/cc/1998/2401/806494f.doc)
Supplement: Supplementary file 1 [file 806494f.doc]

**Supplementary information**

**Bis{(2-diphenylphosphino)phenyl}mercury: a novel bidentate ligand and transfer reagent for the *o*-C6H4PPh2 group**

**Martin A. Bennett,***† **Maria Contel, David C. R. Hockless and Lee L. Welling**

*Research School of Chemistry, Australian National University, Canberra,
A.C.T. 0200, Australia*

# General experimental details (1-14). Analytical data for 12.

All experiments involving organolithium reagents were performed under an inert atmosphere with use of standard Schlenk techniques and all solvents were dried and degassed prior to use. *Caution*: organomercury compounds are toxic; appropriate gloves must be worn when handling them. The compounds *o*-BrC6H4PPh2 and *o*-LiC6H4PPh2 were prepared according to the literature.1

# Preparations

[Hg(*o*-C6H4PPh2)2] **1**. (a) To *o*-LiC6H4PPh2 (0.685 g, 2.56 mmol) in ether (60 ml) was added HgCl2 (0.277 g, 1.02 mmol). After stirring for 60 h at room temperature the solvent was removed and the residue was treated with toluene (50 ml). The LiCl was removed by filtration through Celite. Concentration of the clear solution to ca. 5 ml and addition of n-hexane (20 ml) gave **1** as a white solid. Yield: 0.569 g, 77%.

(b) The complex [HgCl(*o*-C6H4PPh2)]n **2** (0.050 g, 0.1 mmol) (see below) was suspended in EtOH (40 ml) and an excess of KCN (0.032 g, 0.5 mmol) was added. After refluxing for 2 h the solution became clearer and the solvent was removed completely, affording the crude product as a white solid. The product was extracted with CH2Cl2 (20 ml) and the solution was filtered through Celite, then concentrated to ca. 1 ml. Addition of n-hexane (10 ml) and cooling gave **1** as a white solid. Yield: 0.054 g, 75%.

[HgCl(*o*-C6H4PPh2)]n **2**.To *o*-LiC6H4PPh2 (0.359 g, 1.34 mmol) in ether (40 ml) was added HgCl2 (0.330 g, 1.22 mmol). After stirring for 36 h at room temperature the solvent was removed and the residue was treated with CH2Cl2 (70 ml). The LiCl was removed by filtration through Celite. Concentration of the transparent solution to ca. 5 ml and addition of n-hexane (30 ml) gave **2** as a white solid. Yield: 0.315 g, 52%.

[Hg{*o*-C6H4P(O)Ph2}2] **3**.To a solution of **1** (0.108 g, 0.15 mmol) in CH2Cl2 an excess of 30% aq. H2O2 was added and the mixture was stirred for 0.5 h. After decantation, the organic layer was dried (MgSO4). Removal of the solvent to ca. 5 ml and addition of n-hexane (30 ml) gave **3** as a white solid. Yield: 0.050 g, 44%.

[Hg(*o*-C6H4P(E)Ph2}2] (E = S **4**, BH3 **5**).To separate solutions of **1** (0.108 g, 0.15 mmol) in toluene (20 ml) were added sulfur (0.011 g, 0.35 mmol) and BH3.SMe2 (0.032 ml, 0.32 mmol), respectively. After refluxing 18 h in the case of **4**, or stirring at room temperature overnight for **5**, the toluene was completely removed and the white products were dried in a vacuum. Extraction of the residues with toluene/n-hexane gave **4** and **5** as white solids. Yields: 0.114 g, 97% (**4**) and 0.045 g, 40% (**5**). **4**: 31P{1H} NMR (CD2Cl2, 80.96 MHz)  47.7 (s) [3*J*(Hg-P) 259 Hz]; 199Hg{1H} NMR (CD2Cl2, 89.40 Hz)  –483.3 (t) [3*J*(Hg-P) 259 Hz]. **5**: 31P{1H} NMR (CD2Cl2, 80.96 MHz)  22.1 (s,br).

[HgX2{(*o*-Ph2PC6H4)2Hg}] (X = Cl **6a**, Br **6b**).To separate solutions of **1** (0.072 g, 0.1 mmol) in dry CH2Cl2 were added HgCl2 (0.027 g, 0.1 mmol) and HgBr2 (0.032 g, 0.1 mmol), respectively. After stirring for 30 min, white solids started to precipitate. Concentration of the solutions to 5 ml and addition of ether (20 ml) afforded **6a** and **6b** as white solids. Yields: 0.050 g, 51% (**6a**) and 0.078 g, 81% (**6b**). **6b**: 31P{1H} NMR (DMSO, 80.96 MHz) 25.0 (s,br) [1*J*(Hg-P) 4335 Hz, 3*J*(Hg-P) 537 Hz].

[PtR2{(*o*-Ph2PC6H4)2Hg}] (R = Cl **7**, Me **8**, Ph **9**).To separate solutions of **1** (0.108 g, 0.15 mmol) in dry CH2Cl2 (20ml) were added [PtCl2(cod)] (0.056 g, 0.15 mmol), [PtMe2(-SEt2)]2 (0.050 g, 0.075 mmol), and [PtPh2(SEt2)2] (0.131 g, 0.15 mmol), respectively. After stirring for 1 h at room temperature the pale yellow solutions were concentrated to ca. 5 ml and n-hexane (20 ml) was added, giving **7**, **8** and **9** as white solids. Yields: 0.103 g, 70% (**7**), 0.120 g, 85% (**8**) and 0.104 g, 65% (**9**).

[PdCl2{(*o*-Ph2PC6H4)2Hg}] **10**.To a solution of **1** (0.108 g, 0.15 mmol) in dry CH2Cl2 (20 ml) was added [PdCl2(SEt2)2] (0.045 g, 0.15 mmol). After stirring for 40 min at room temperature the bright yellow solution was concentrated to ca. 5 ml. Addition of 30 ml of n-hexane gave **10** as a yellow solid. Yield: 0.092 g, 68%. Recrystallization from CH2Cl2/Et2O afforded single crystals (yellow needles) suitable for X-ray diffraction.

[Pd{(*o*-Ph2PC6H4)2Hg}2] **12** and (2,2'-biphenyldiyl)bis(diphenylphosphine) **13**.To a solution of **1** (0.217 g, 0.30 mmol) in dry toluene was added [Pd(dba)2] (0.086 g, 0.15 mmol). After stirring for 5 min at room temperature, the colour faded from deep red to orange-yellow. This colour did not change even after stirring for 24 hours at room temperature. The solution was concentrated to ca. 5 ml. Addition of n-hexane (10 ml) and cooling gave complex **12** as orange crystals. Yield: 0.121 g, 52%. Anal. Found: 55.42; H, 3.74; Hg, 26.10. Calcd for C72H56P4Hg2Pd: C, 55.70; H, 3.64; Hg, 25.84. Mass spec (FAB+, nba as matrix): M, (m/z = 1552, 17%).

When the toluene solution containing [Pd(dba)2] and 1 was heated for 30 min, a black deposit containing metallic Pd and Hg was formed. The mixture was filtered under nitrogen through a silica column and washed with dry toluene (40 ml). Concentration of the filtrate to ca. 5 ml and addition of n-hexane (30 ml) afforded compound **13** as a white solid. Yield: 0.099 g, 60%. Mass spec (FAB+, nba as matrix): M+2O, (m/z = 555, 100%).

*trans*-[PtCl(C6H4PPh2)(PPrS(1,3)] **14**:To a solution of **1** (0.063 g, 0.88 mmol) in toluene was added *trans*-[PtHCl(PPrS(1,3))2­] (0.044 g, 0.80 mmol). The clear solution was refluxed for 16 h and metallic mercury was separated by filtration through Celite. Concentration of the filtrate to ca. 2 ml and addition of n-hexane (10 ml) gave the crude product as a colourless solid, which was recrystallised from CH2Cl2/Et2O. Yield: 0.017 g, 33%.

**Reference**

1 S. Harder, L. Brandsma, J. A. Kanters, A. Duisenberg and J. H. van Lenthe, *J. Organomet. Chem.*, 1991, **420**, 143.⅁
